# Supplementary material for: Reversal of neurobehavioral social deficits in dystrophic mice using inhibitors of phosphodiesterases PDE5A and PDE9A
Source: PubMed Central journal article supplement (PMC5048211; doi:10.1038/tp.2016.174), 2016-09-27
Supplement: tp2016174x1.pdf [file tp2016174x1.pdf]

Supplemental Figure 1

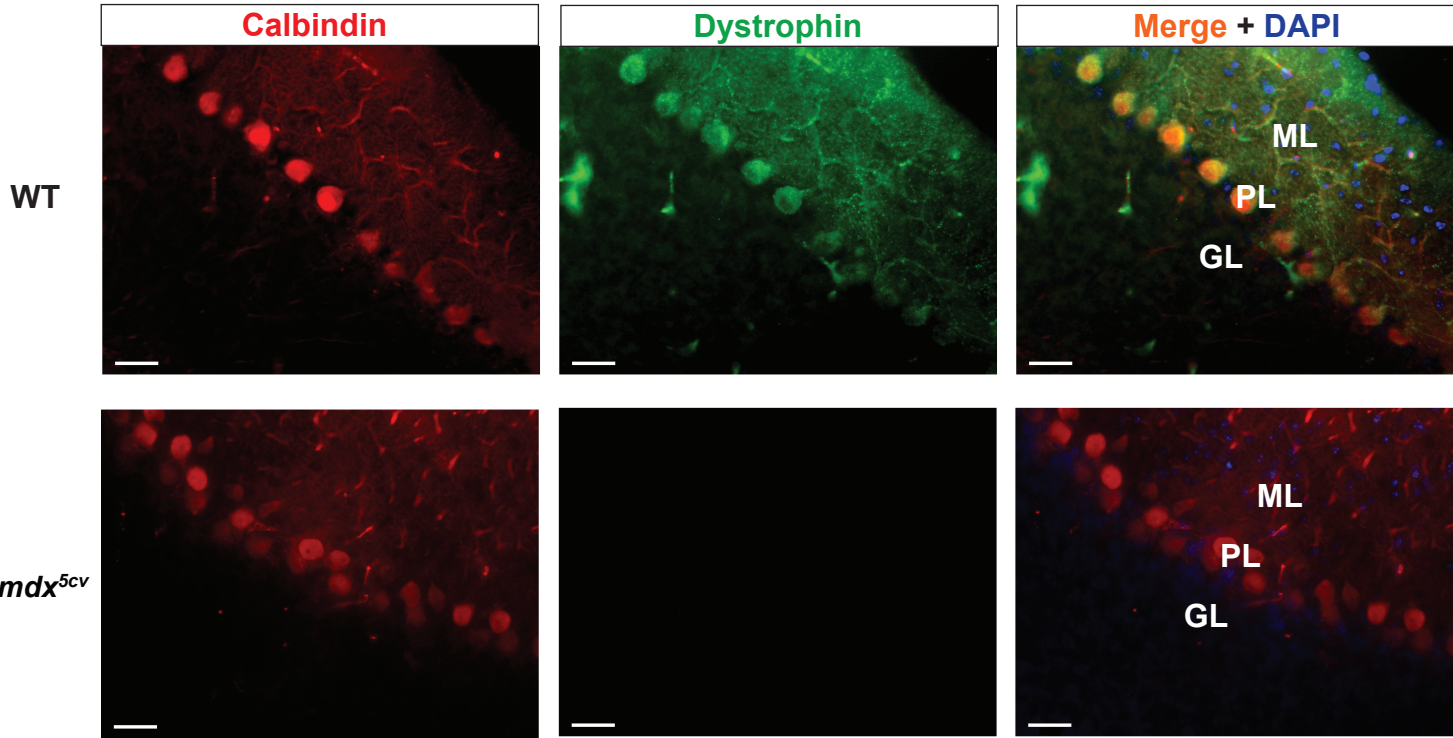

Supplemental Figure 1. Dystrophin protein is enriched in the Purkinje neurons of an adult mouse cerebellum.
