# Supplementary material for: Reversal of neurobehavioral social deficits in dystrophic mice using inhibitors of phosphodiesterases PDE5A and PDE9A
Source: PubMed Central journal article supplement (PMC5048211; doi:10.1038/tp.2016.174), 2016-09-27
Supplement: tp2016174x2.pdf [file tp2016174x2.pdf]

# Supplemental Figure 2

A.

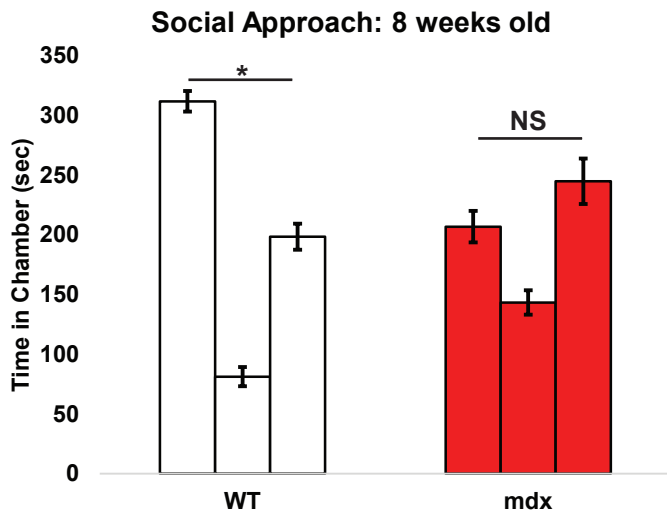

B.

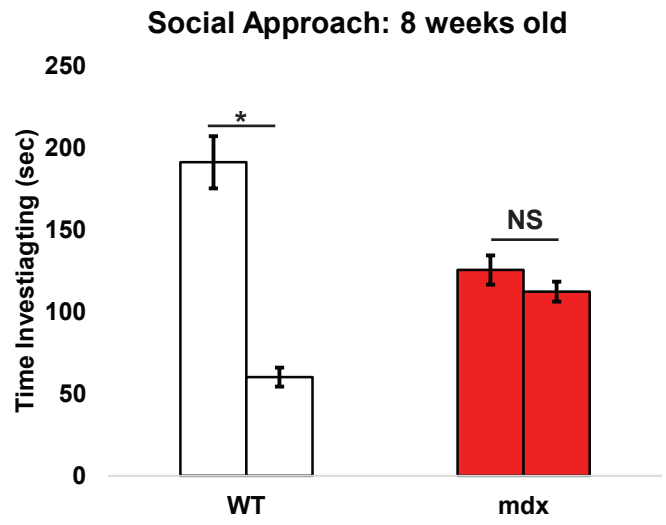

Supplemental Figure 2. The *mdx* mutant mice show social approach neurobehavioral deficits compared to wild type mice.
