# Supplementary material for: Reversal of neurobehavioral social deficits in dystrophic mice using inhibitors of phosphodiesterases PDE5A and PDE9A
Source: PubMed Central journal article supplement (PMC5048211; doi:10.1038/tp.2016.174), 2016-09-27
Supplement: tp2016174x3.pdf [file tp2016174x3.pdf]

# Supplemental Figure 3

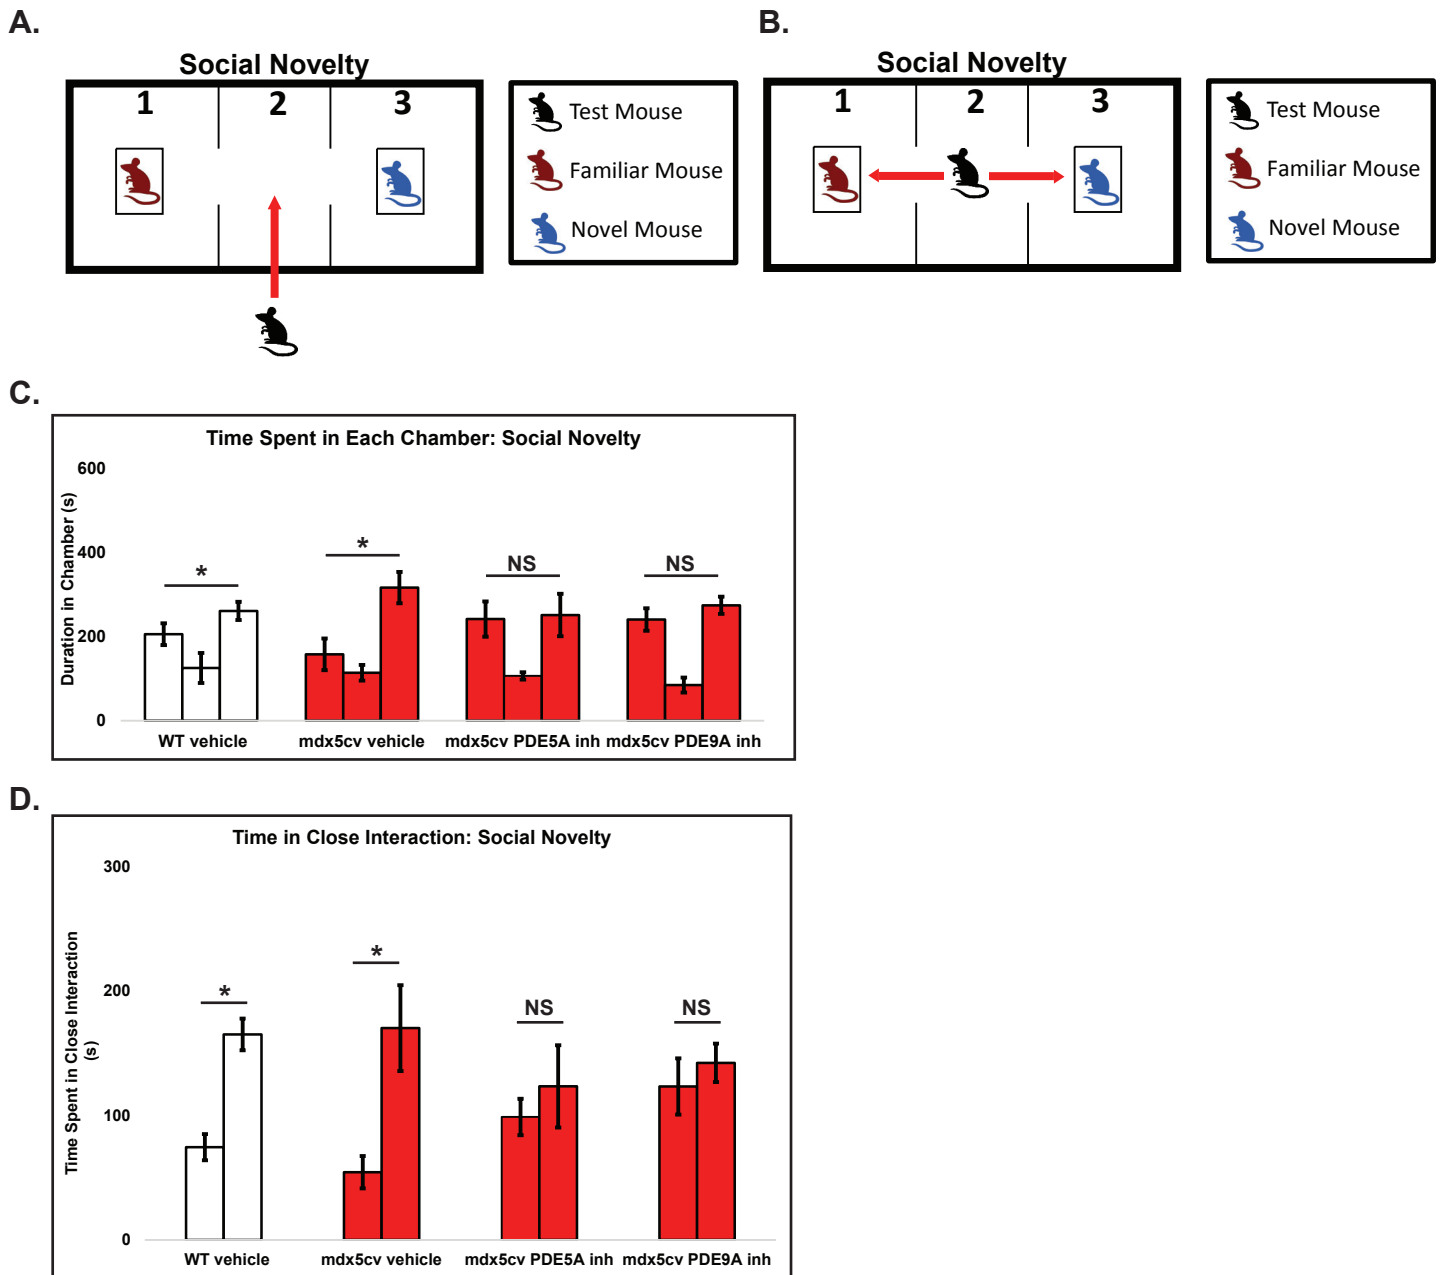

Supplemental Figure 3. Social novelty data in PDE inhibitor-treated adult wild type and mdx5cv mouse cohorts.
